# Supplementary material for: Disruption of asxl1 results in myeloproliferative neoplasms in zebrafish
Source: Oxford University Press journal article supplement (doi:10.1242/dmm.035790), 2019-05-01
Supplement: dmm035790supp.pdf [file dmm035790supp.pdf]

Fig. S2

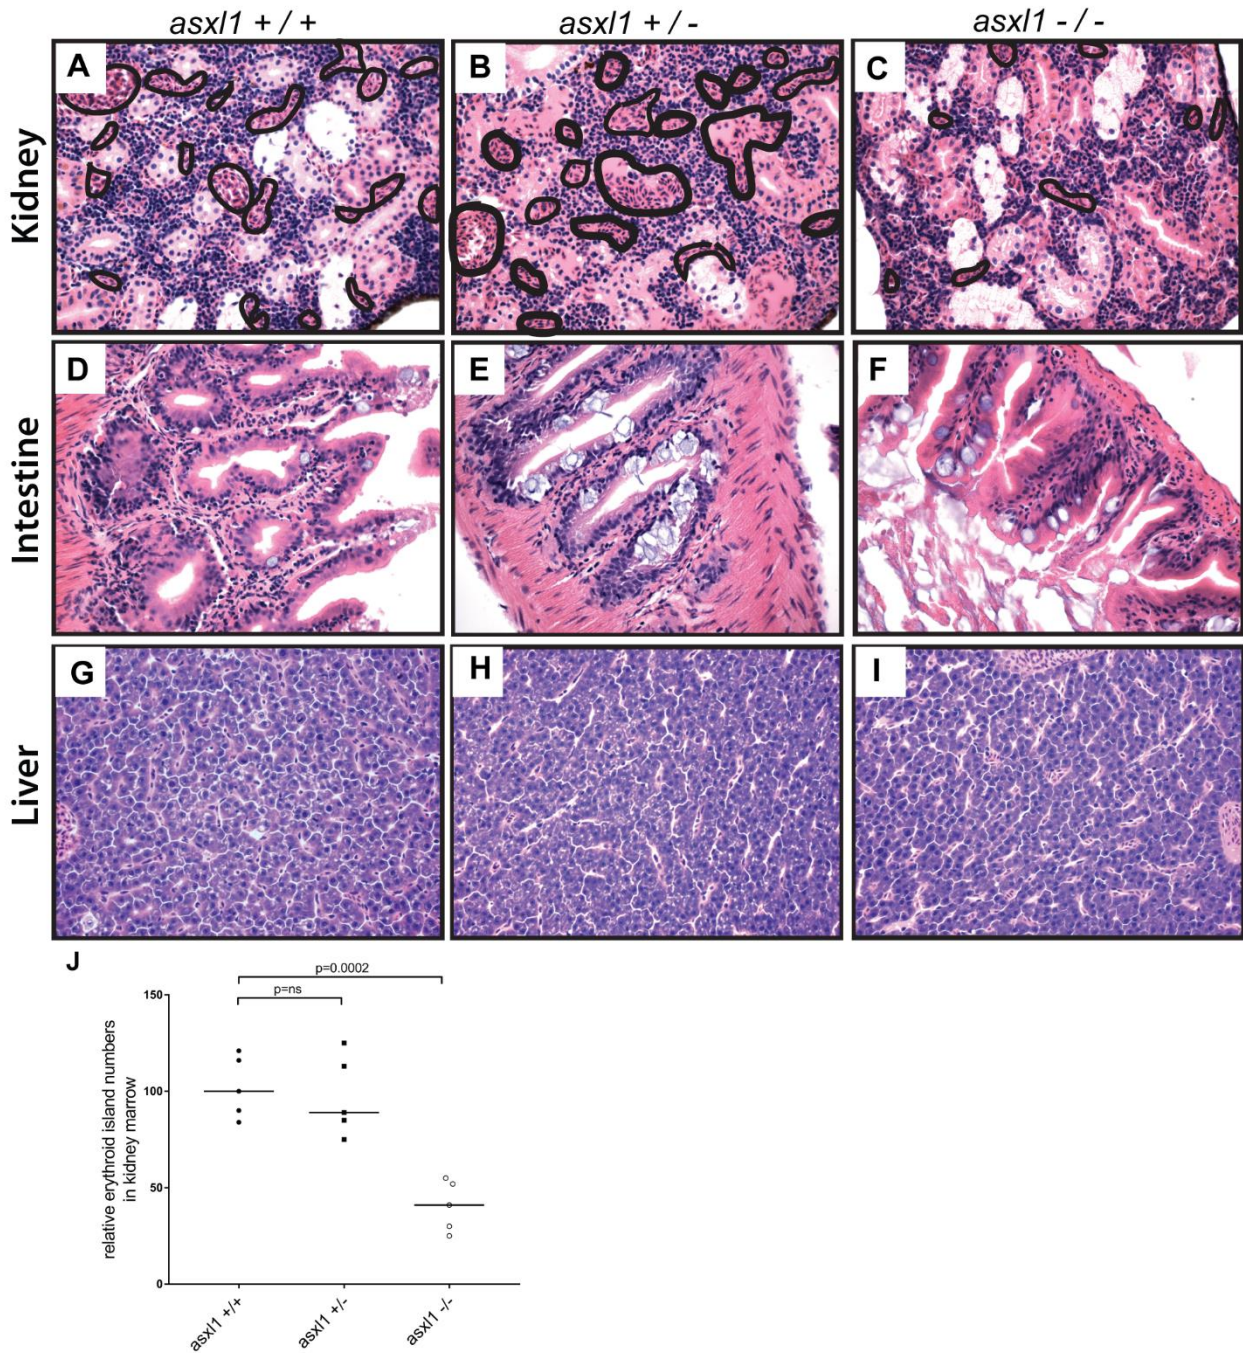

**Fig. S2. Histopathological analysis of kidney, intestine and liver development in 17-month-old *asx11* $+/+$  and *asx11* $+/-$  and *asx11* $-/-$  fish.** Results revealed that intestine (D, E and F) and liver (G, H and I) was normal and similar to that of the fish, indicating that these fish recovered from early developmental hypoplasia in these organs. However, *asx11* $-/-$  mutants did have decreased numbers of erythroid islands in the kidney marrow compared with *asx11* $+/+$  and *asx11* $+/-$  fish (A, B and C), indicating that the hematopoietic system is abnormal in these animals. Area encircled with black line indicates erythroid islands. The quantification of erythroid islands was shown in (J), with the black bars representing the median values. ns  $p>0.05$ ,  $*p<0.05$ ,  $**p<0.01$  by two-tailed unpaired t-test.

Fig.S3

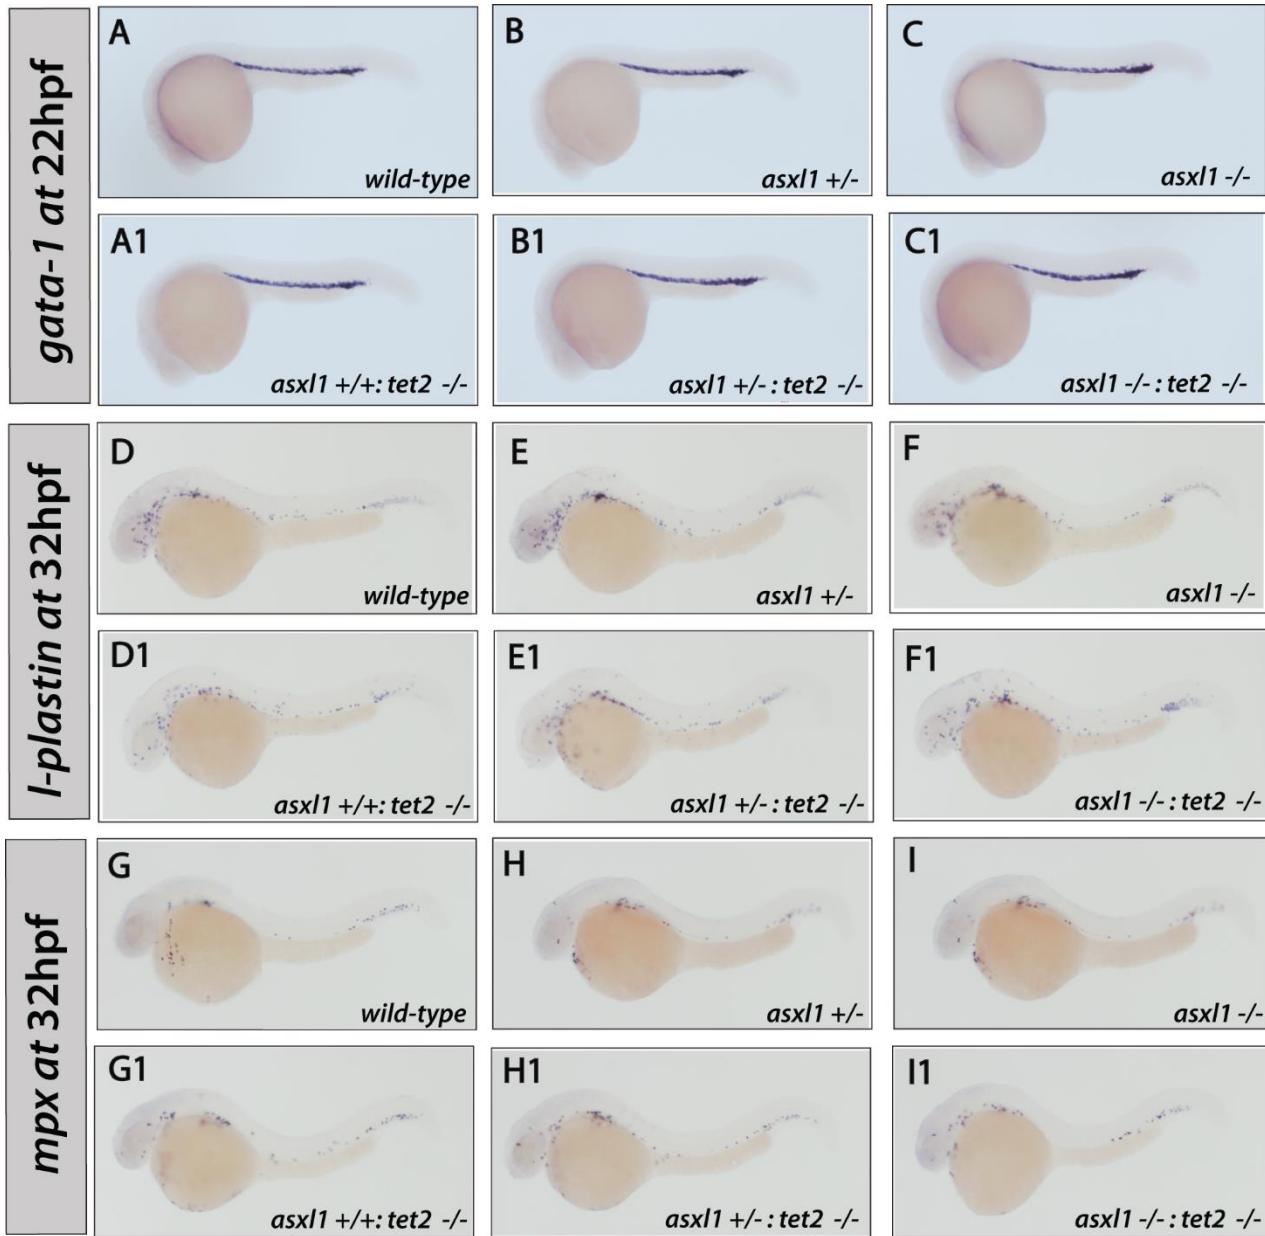

**Fig. S3.** Whole-mount *in situ* hybridization (WISH) for *gata-1* (22 hours-post-fertilization), *l-plastin* and *mpx* (22 hours-post-fertilization) was performed in *asx1* +/+, *asx1* +/-, *asx1* -/-, *asx1* +/-*tet2* -/-, *asx1* +/-*tet2* +/- and *asx1* -/-*tet2* +/- zebrafish embryos. This assay shows that there is no difference in the number of cells expressing *gata-1*, *l-plastin* and *mpx* among all the different genotypes.

**Fig.S4**

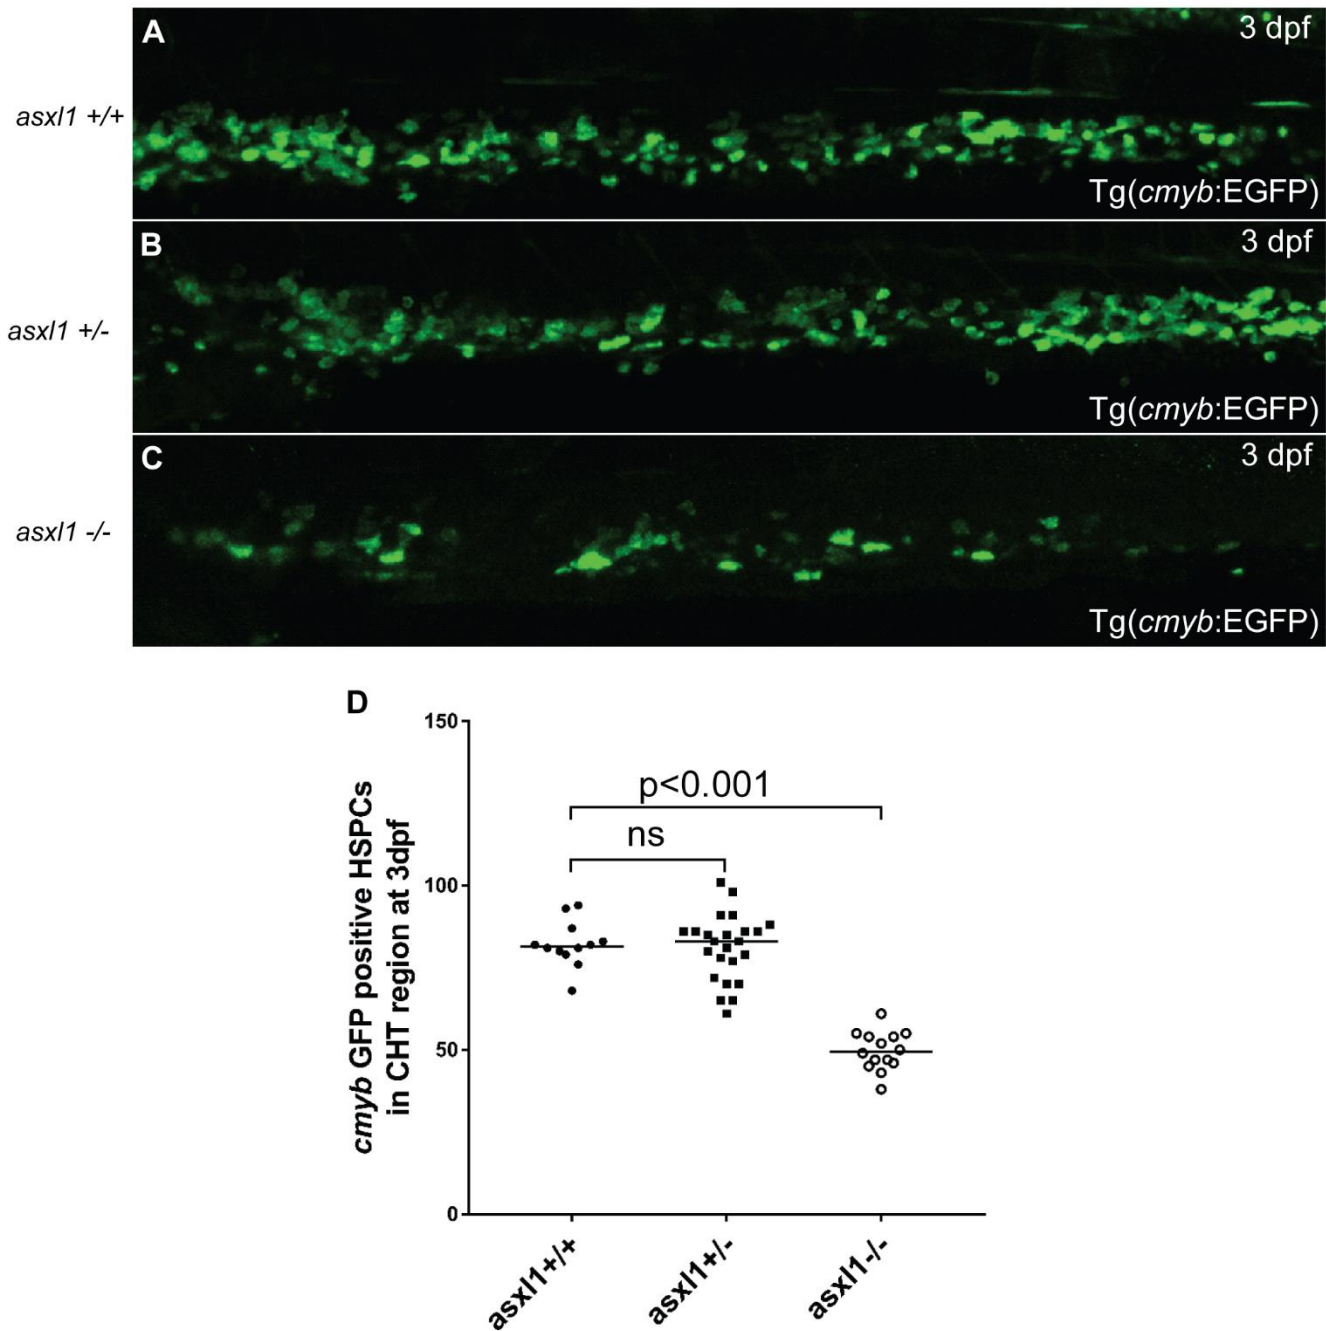

**Fig. S4.** The number of HSPCs in the CHT is reduced in the *asx11* *-/-* embryos at 3 dpf. (A-C) EGFP+ HSPCs in *asx11* *+/+*, *asx11* *+/-* and *asx11* *-/-* embryos. (D) Statistical analysis of HSPC numbers in *asx11* *+/+*, *asx11* *+/-* and *asx11* *-/-* embryos indicate that EGFP+ HSPCs are decreased in CHT region in *asx11* *-/-* embryos at 3 dpf.

**Fig.S5**

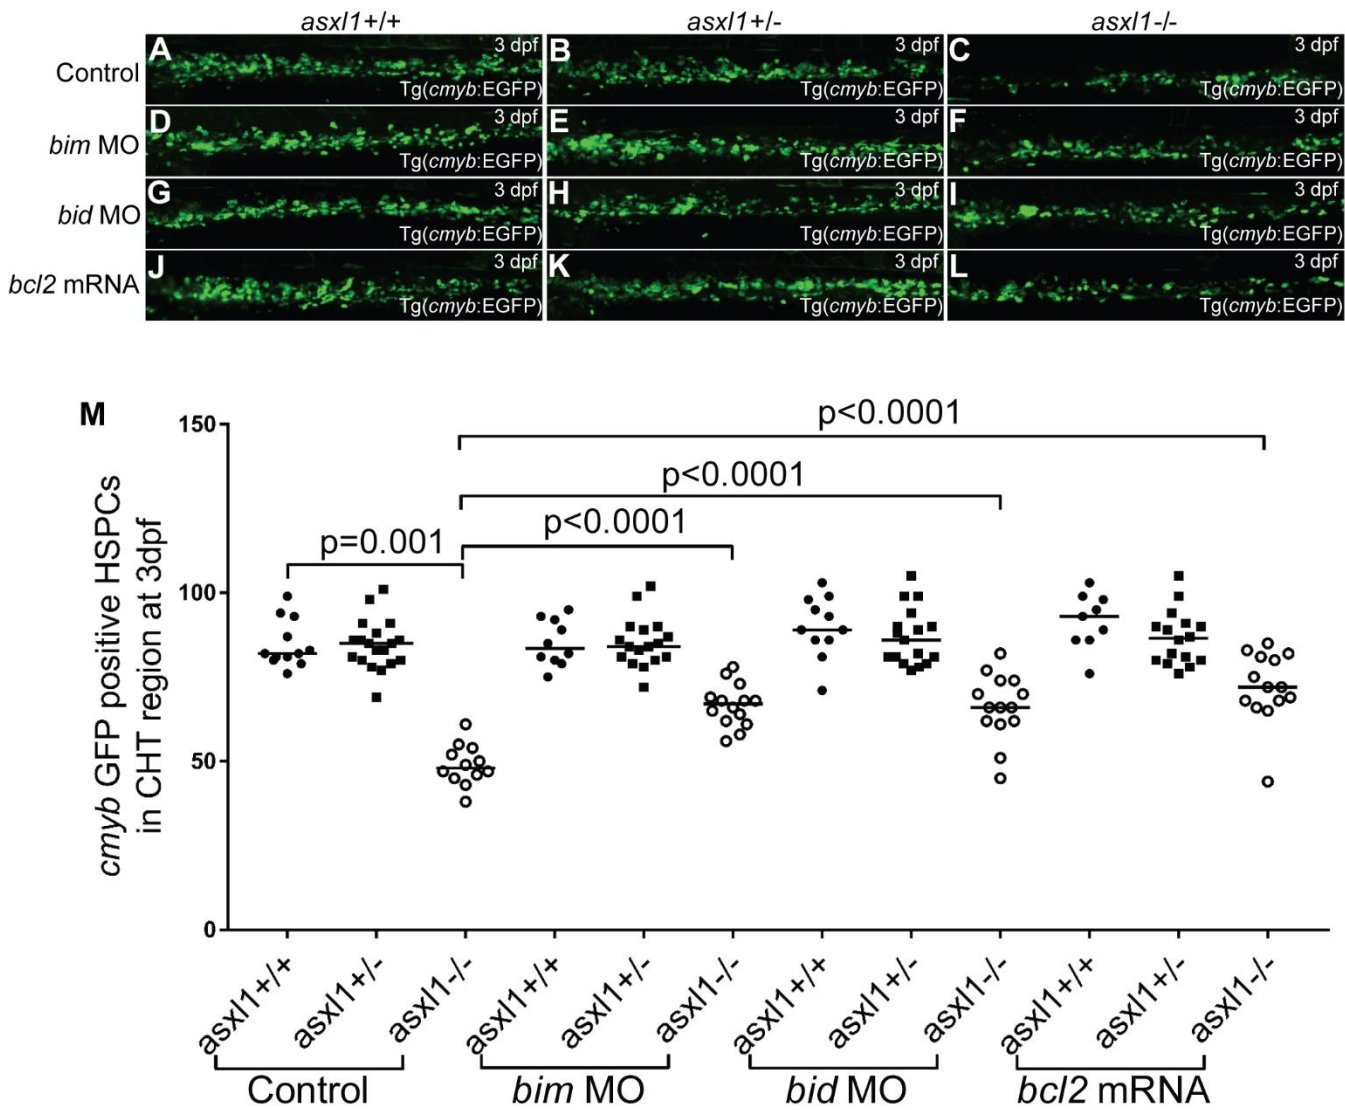

**Fig. S5. EGFP+ HSPCs in *asx11* <sup>+/+</sup>, *asx11* <sup>+/-</sup> and *asx11* <sup>-/-</sup> embryos at 3 dpf.** Knockdown of *bim* (D-F) and *bid* (G-I) or overexpression of *bcl2* (J-L) each were able to partially rescue HSPC numbers in *asx11* <sup>-/-</sup> embryos compared with control embryos. This result is expected because mitochondrial intrinsic programmed cell death depends on the combined activities of BH3-only pro-apoptotic proteins and is blocked by prosurvival proteins like *bcl2*.

Fig.S6

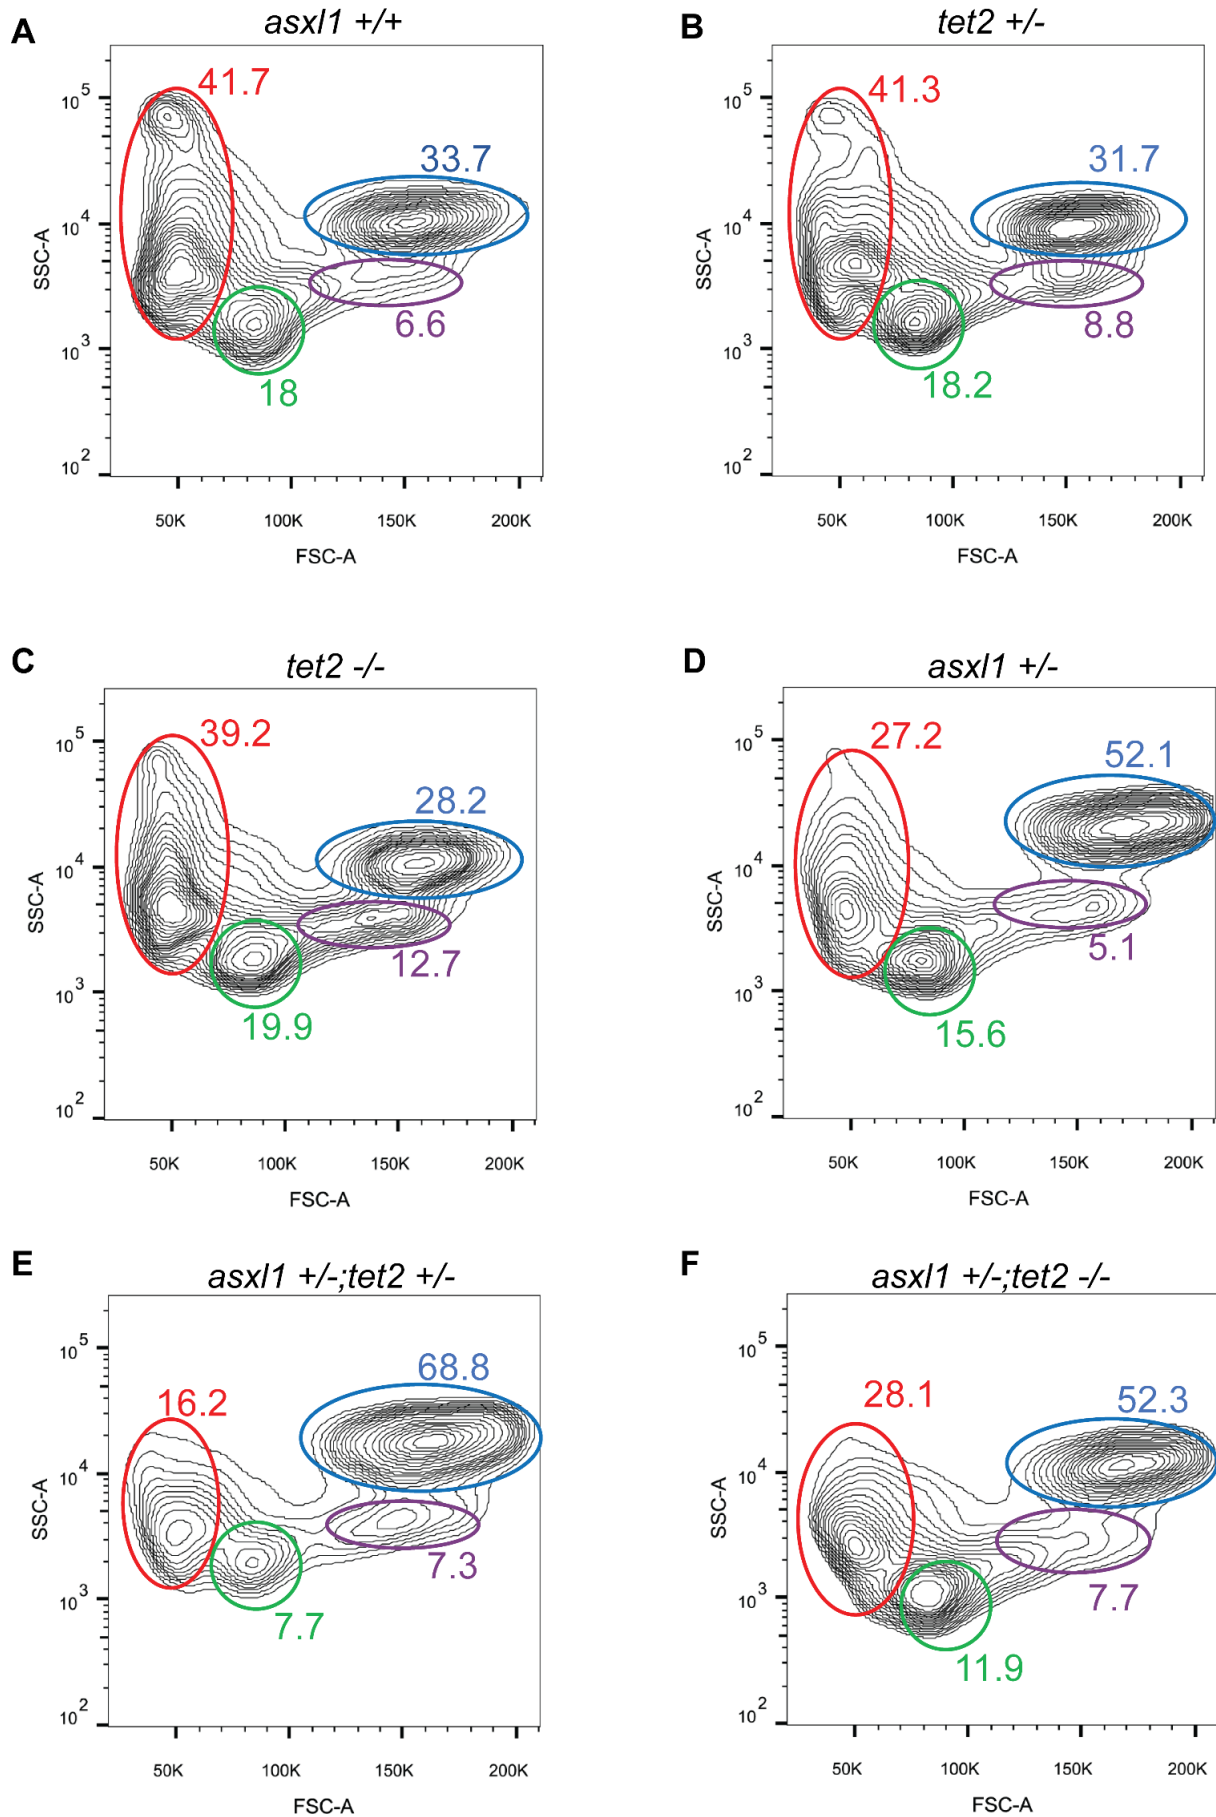

**Fig. S6. Forward versus side scatter analysis plots for kidney marrow cell populations in 5-month-old.**

*asx11* +/+ (A), *tet2* +/- (B), *tet2* -/- (C), *asx11* +/- (D), *asx11* +/-;*tet2* +/- (E) and *asx11* +/-;*tet2* -/- (F).

Erythrocyte cell contours are circled in red, lymphocyte cell contours are circled in green, myelomonocytes cell contours are circled in blue, and progenitor cell contours are circled in purple.

Table S1

| Name                           | Sequence                          |
|--------------------------------|-----------------------------------|
| <b>p53 MO</b>                  | <b>GCGCCATTGCTTTGCAAGAATTG</b>    |
| <b>Control MO</b>              | <b>GGTCAGCATTCAAGAGACCATGCAT</b>  |
| <b>bid MO</b>                  | <b>GGTCAAAGTTCCTGTTGAAGTCCAT</b>  |
| <b>bim MO</b>                  | <b>TACTAAACTCCCGTTTGAACCTCACC</b> |
| <b>bim genotyping-WT-f</b>     | <b>GAGCAAACGCTGGCCAATGGCCCGG</b>  |
| <b>bim genotyping-WT-r</b>     | <b>GTCCGTCTTGCGCTTCGGAAATATT</b>  |
| <b>bim genotyping-mutant-f</b> | <b>CGACAGCGATTCTGTGCCAGGTTC</b>   |
| <b>bim genotyping-mutant-r</b> | <b>GACGCAGGCGCATAAAATCAGTC</b>    |
| <b>p53 rt-f</b>                | <b>ttcgagccactgccatctat</b>       |
| <b>p53 rt-r</b>                | <b>ttgccctccactcttataaaa</b>      |
| <b>puma rt-f</b>               | <b>caggacagtctactcagggaca</b>     |
| <b>puma rt-r</b>               | <b>ctagcagatctggcagaggaa</b>      |
| <b>bim rt-f</b>                | <b>agttcaatcgccctctactgtga</b>    |
| <b>bim rt-r</b>                | <b>gacgatggcgtgttcgtt</b>         |
| <b>bid rt-f</b>                | <b>gcgacctacagagacctttaca</b>     |
| <b>bid rt-r</b>                | <b>gagcctcttctgcattgactg</b>      |
| <b>bax rt-f</b>                | <b>gtttgcagcagatcggagat</b>       |
| <b>bax rt-r</b>                | <b>ggccactctgatgaagacg</b>        |
| <b>bik rt-f</b>                | <b>ctagaaaagtggcagcttgg</b>       |
| <b>bik rt-r</b>                | <b>tgccagggtgtatgtagtgc</b>       |
| <b>bcl2 rt-f</b>               | <b>tggcgtcccaggtagataat</b>       |
| <b>bcl2 rt-r</b>               | <b>accgtacatctccacgaagg</b>       |
| <b>bcl XI rt-f</b>             | <b>cgctctggcactacactgaa</b>       |
| <b>bcl XI rt-r</b>             | <b>tgtcatctgctttccacactg</b>      |
| <b>mcl1 rt-f</b>               | <b>gcaggactggatcctcaaaa</b>       |
| <b>mcl1 rt-r</b>               | <b>ccatgacggacaacagactc</b>       |
| <b><i>b-actin</i> rt-f</b>     | <b>TACAATGAGCTCCGTGTTGC</b>       |
| <b><i>b-actin</i> rt-r</b>     | <b>ACATACATGGCAGGGGTGTT</b>       |

Table S1. All primers sequences used in this paper, including genotyping primers and real-time PCR primers.
